# Supplementary material
Source: PubMed Central journal article supplement (PMC4320269)
Supplement: mmc1.pdf [file mmc1.pdf]

The American Journal of Human Genetics

Supplemental Data

## **Adjusting for Heritable Covariates Can Bias Effect**

## **Estimates in Genome-Wide Association Studies**

Hugues Aschard, Bjarni J. Vilhjálmsson, Amit D. Joshi, Alkes L. Price, Peter Kraft

|                                                                                                                         |           |
|-------------------------------------------------------------------------------------------------------------------------|-----------|
| <b>Figure S1. Illustrative examples of direct acyclic graphs.....</b>                                                   | <b>2</b>  |
| <b>Figure S2. Statistical power in adjusted analysis.....</b>                                                           | <b>3</b>  |
| <b>Figure S3. Effect of the adjustment on estimate .....</b>                                                            | <b>4</b>  |
| <b>Figure S4. Opposite genetic effects between BMI and WHR/WC.....</b>                                                  | <b>5</b>  |
| <b>Figure S5. QQplot under the null for three corrections.....</b>                                                      | <b>6</b>  |
| <b>Figure S6. Bias in covariate stratified analysis.....</b>                                                            | <b>7</b>  |
| <b>Table S1. Genetic effect estimates and p-value for association with T2D before and after adjustment for BMI.....</b> | <b>8</b>  |
| <b>Table S2. Additional examples of genetically-associated covariate GWAS .....</b>                                     | <b>9</b>  |
| <b>Table S3. Mean chi-square for adjusted and unadjusted analysis across 15 null models .....</b>                       | <b>10</b> |
| <b>References.....</b>                                                                                                  | <b>11</b> |

**Figure S1. Illustrative examples of direct acyclic graphs.**

$Y$  is the outcome,  $C$  is a potential covariate,  $g$  is a predictor of interest, and  $U$  is an unmeasured variable that can results or depends on  $Y$ ,  $C$  and  $g$ .

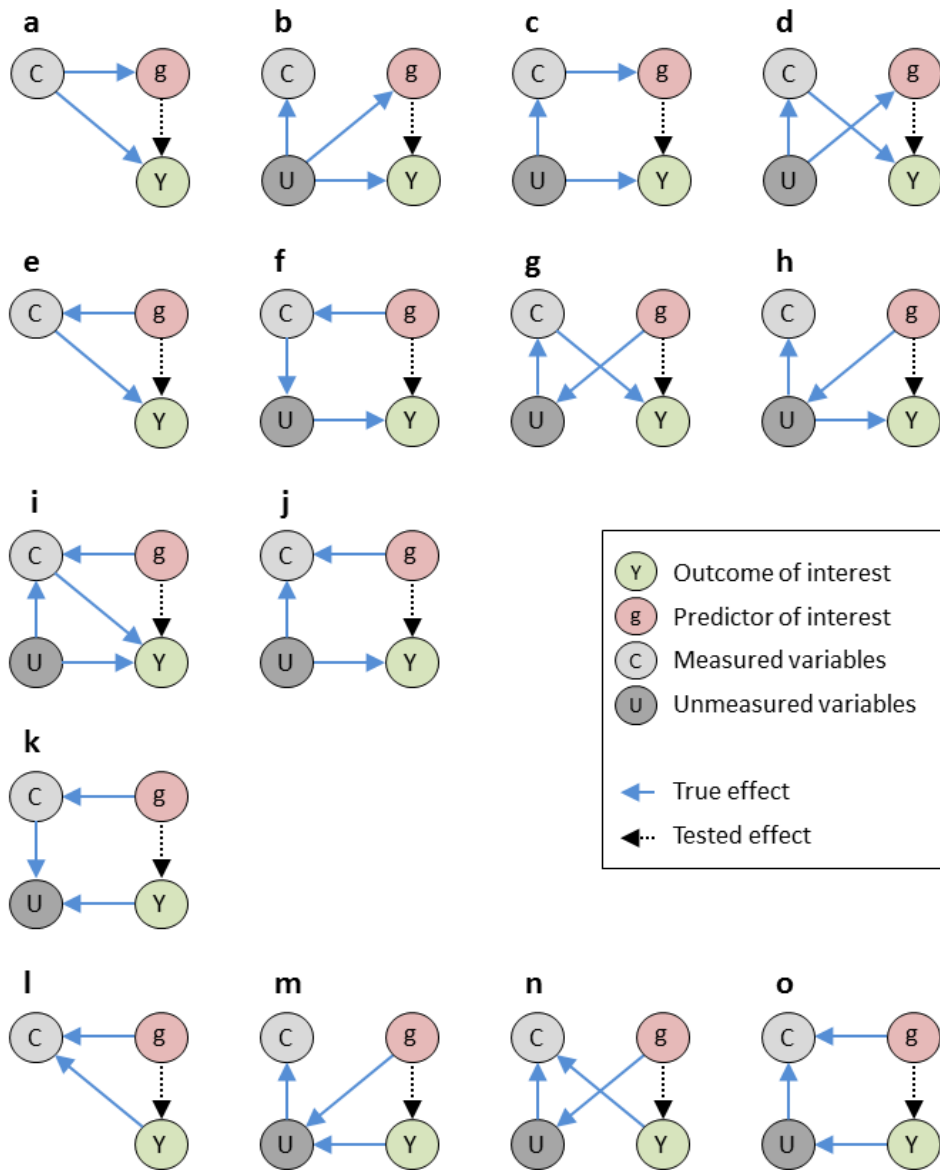

### Figure S2. Statistical power in adjusted analysis

Statistical power when the genetic variant is differentially associated with two correlated phenotypes. Two traits  $Y$  and  $C$  are simulated with correlation  $\rho_{CY}$  varying from 0 to 0.9. A genetic variant  $g$  has a positive effect  $\beta_Y$  on  $Y$  and explains 0.015% (left panel) or 0.04% (right panel) of its variance; we vary the effect of  $g$  on  $C$  between  $-\beta_Y$  and  $\beta_Y$ . a) We compared the power at  $5 \times 10^{-8}$  significance level to detect the  $g/Y$  association between the marginal model (unadjusted for  $C$ , red line) to the adjusted model (light grey to black plain line). b) We plotted the power to detect the marginal  $g/C$  association (light blue to dark blue plain line) while varying  $\alpha$ , the significance level.

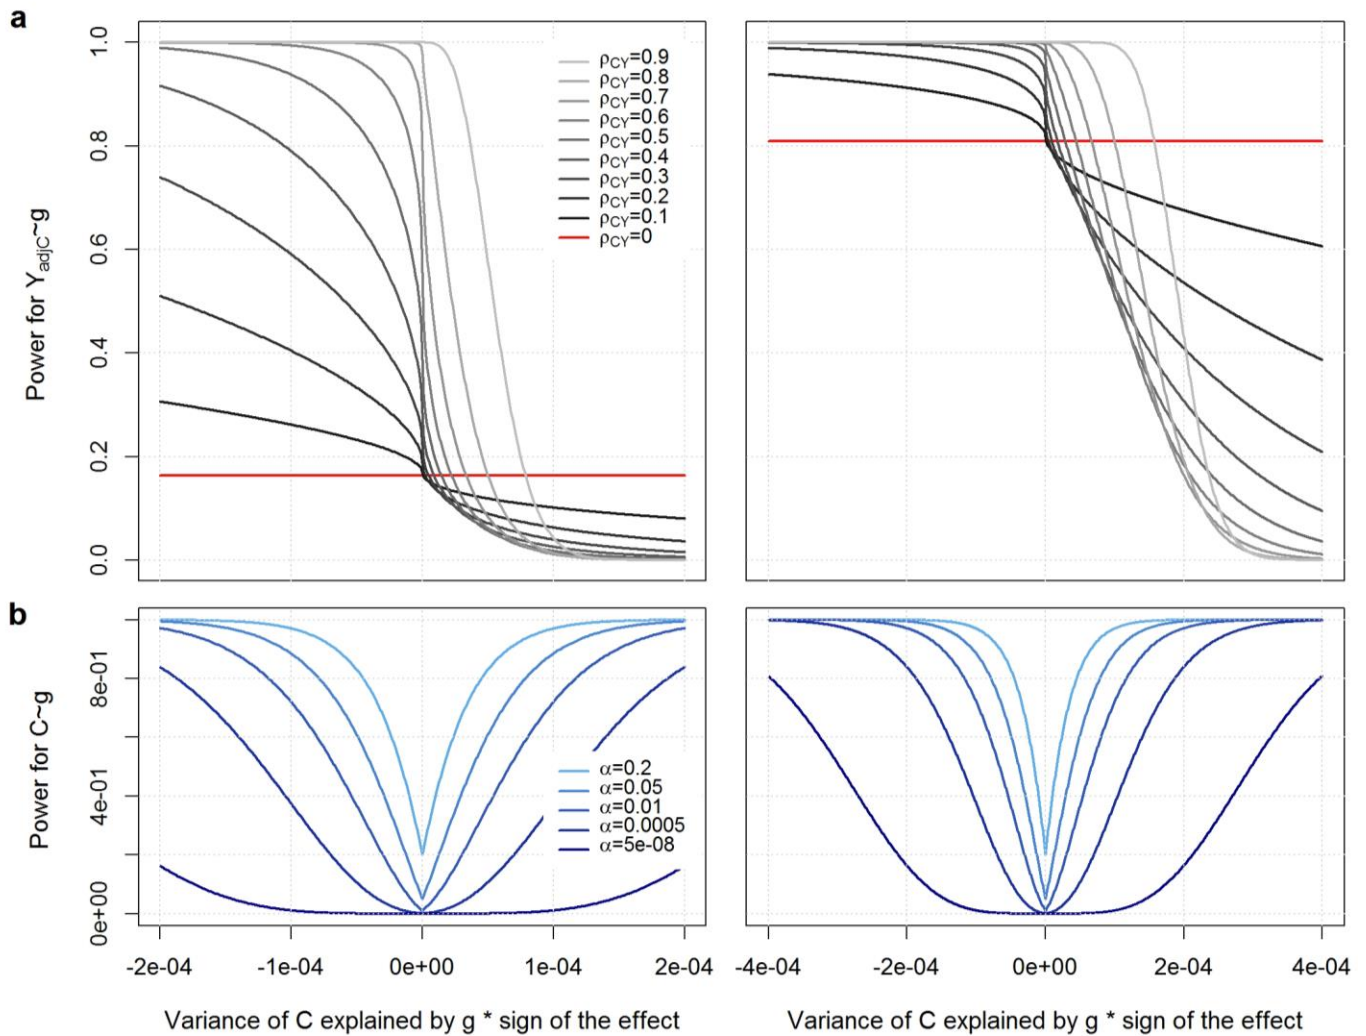

### Figure S3. Effect of the adjustment on estimate

Upper panel presents  $\hat{\beta}_Y$  the estimated effect of  $G$  on  $Y$  in the unadjusted model as a function of  $\hat{\beta}_C$  the estimated effect of  $G$  on  $C$  across 1,000 replicates of 100,000 subjects (grey dots) and the regression line (black) when the correlation between  $C$  and  $Y$  is 0.5,  $\beta_C = 0$  and  $\beta_Y = 0$  (a) or  $\beta_Y = 0.3$  (b). Upper plots also display  $\Delta_{\hat{\beta}_Y} = \hat{\beta}_Y - \hat{\beta}_{Yadj}$  the change in estimates before and after the adjustment for  $C$  (blue dots). This change corresponds on average to the deviation of  $\hat{\beta}_Y$  from  $\beta_Y$ . Bottom panel shows the correlation between  $\hat{\beta}_C$  and the  $p$ -values of  $\hat{\beta}_{Yadj}$ , the estimate of  $G$  on  $Y$  after adjustment for  $C$  for the same replicates.

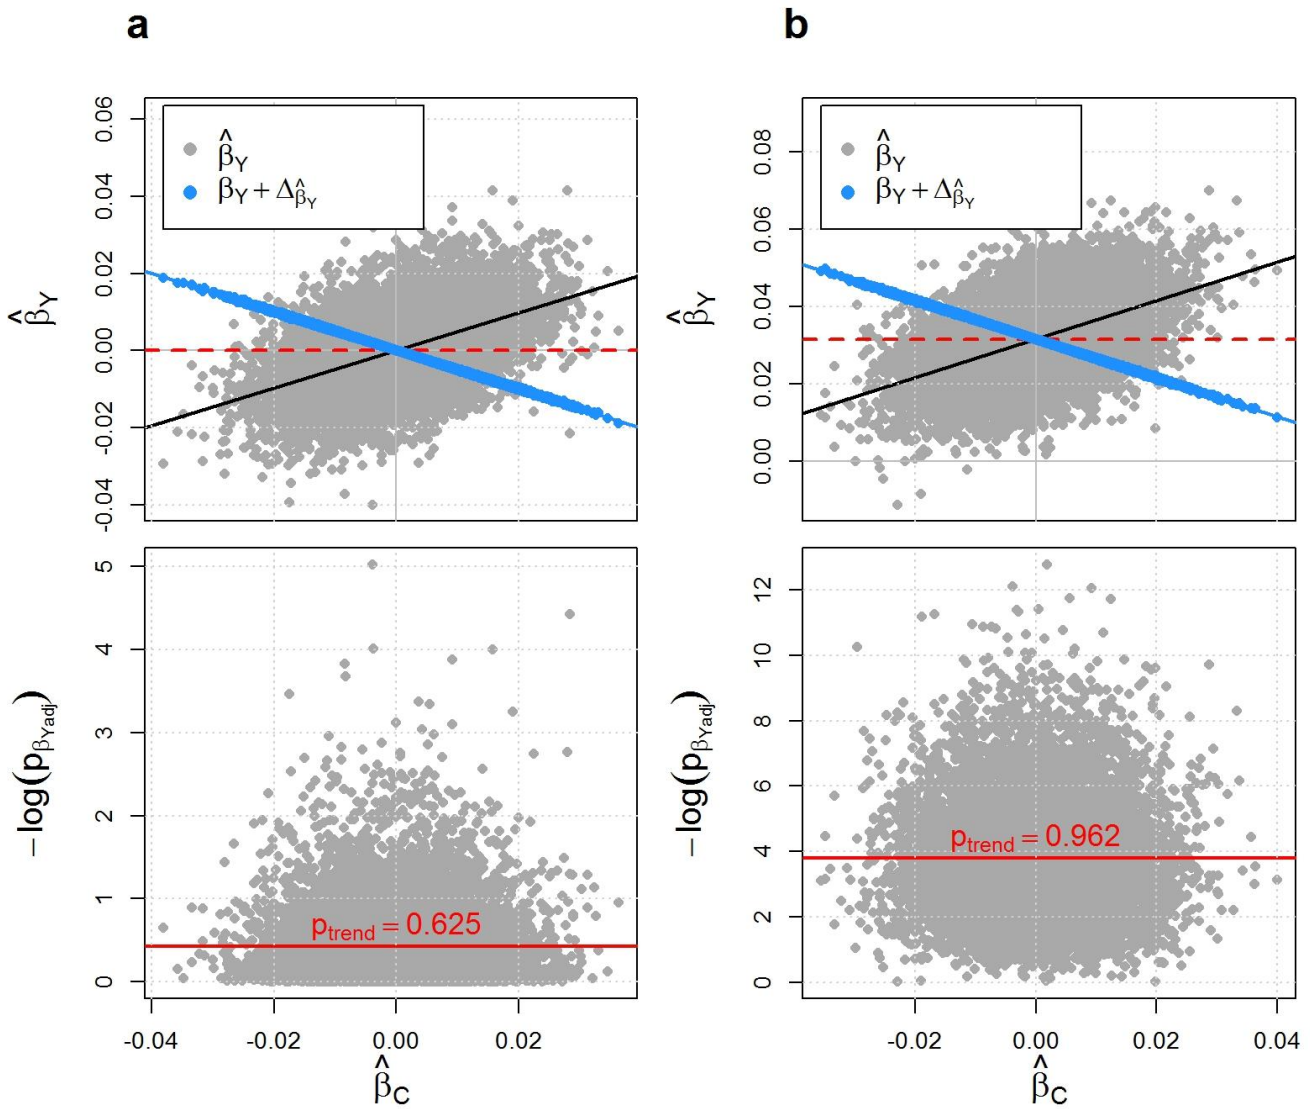

### Figure S4. Opposite genetic effects between BMI and WHR/WC

Log<sub>10</sub> p-value of the observed proportion of SNP with effects in opposite direction when assuming a binomial distribution with probability 0.5, when filtering out SNPs based on their *p*-value for association with BMI.

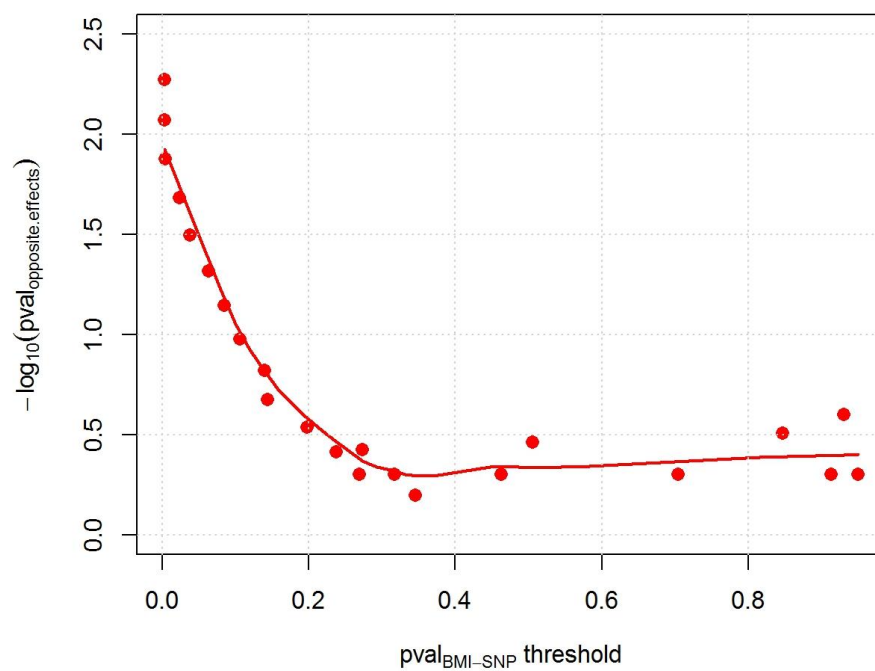

### Figure S5. QQplot under the null for three corrections.

We generated 10,000 replicates of 1,000 subjects. For each replicates we simulated normally distributed variables  $Y$ ,  $C$  and  $g$ , so that  $C$  and  $Y$  display a correlation of 0.5 and  $g$  explained 1% of the variance of  $C$  but none of  $Y$ . We derived the inflation factor  $\lambda$  and plotted the observed distribution of  $p$ -value for tests of association between  $Y$  and  $g$  against its expected distribution. We considered a marginal model in the whole sample (black), a model adjusted for the raw values of  $C$  (grey) or after removing either the true effect of  $g$  on  $C$  (blue) or its estimated effect (green), a  $C$ -specific strata of the marginal model ( $C \geq 0$ , dark red dots, and  $C < 0$ , light red), and a two-step procedure proposed by Vansteelandt et al<sup>1</sup> (orange).

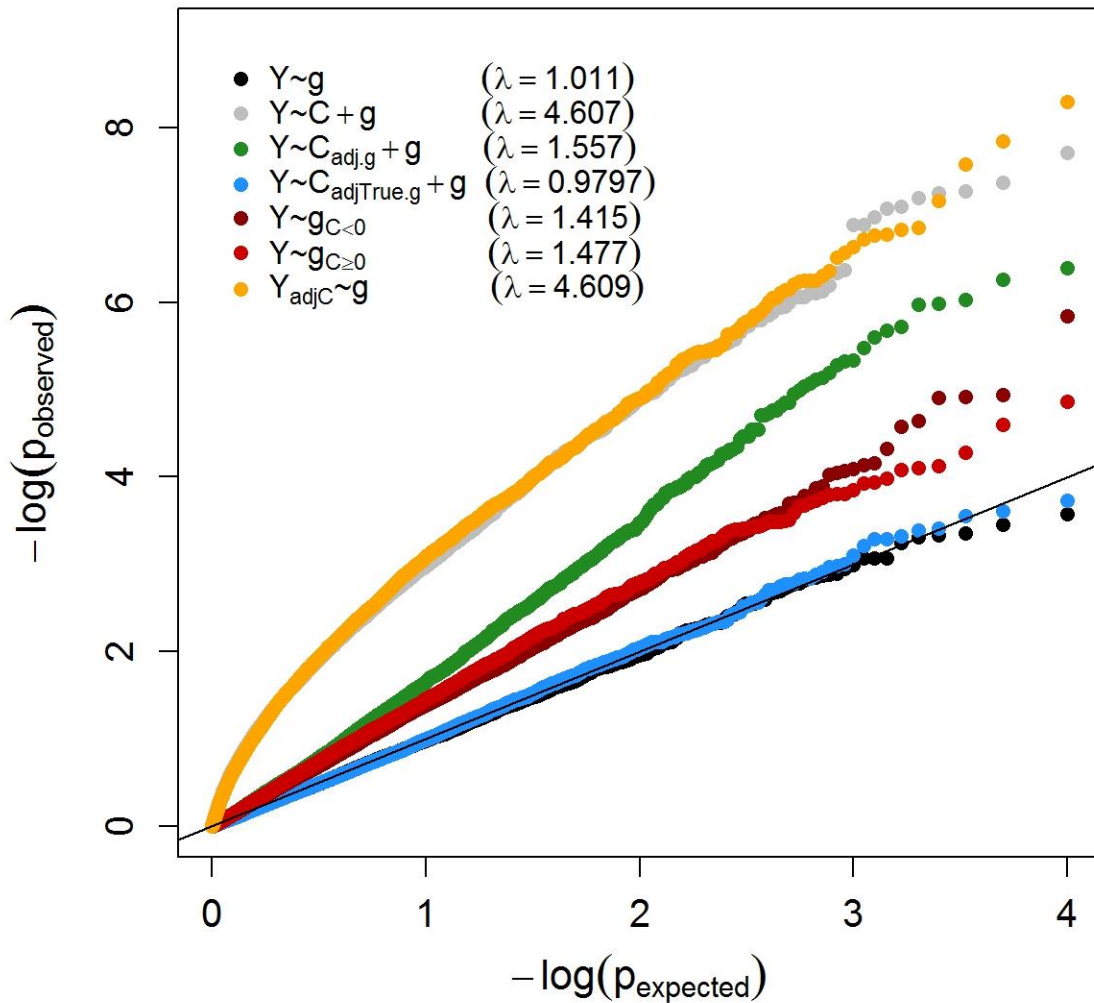

**Figure S6. Bias in covariate stratified analysis.**

Outcome values ( $Y$ ) as a function of a continuous predictor ( $G$ ) in the total sample and in strata defined by a covariates ( $C$ ). For simplicity all variables,  $G$ ,  $C$  and  $Y$  are normally distributed and generated under model from Figure 1B. The plain lines are the regression lines for the association between  $G$  and  $Y$ . While there is no correlation between  $Y$  and  $G$  in the whole sample (a),  $Y$  and  $G$  display a negative correlation in each  $C$  strata (b).

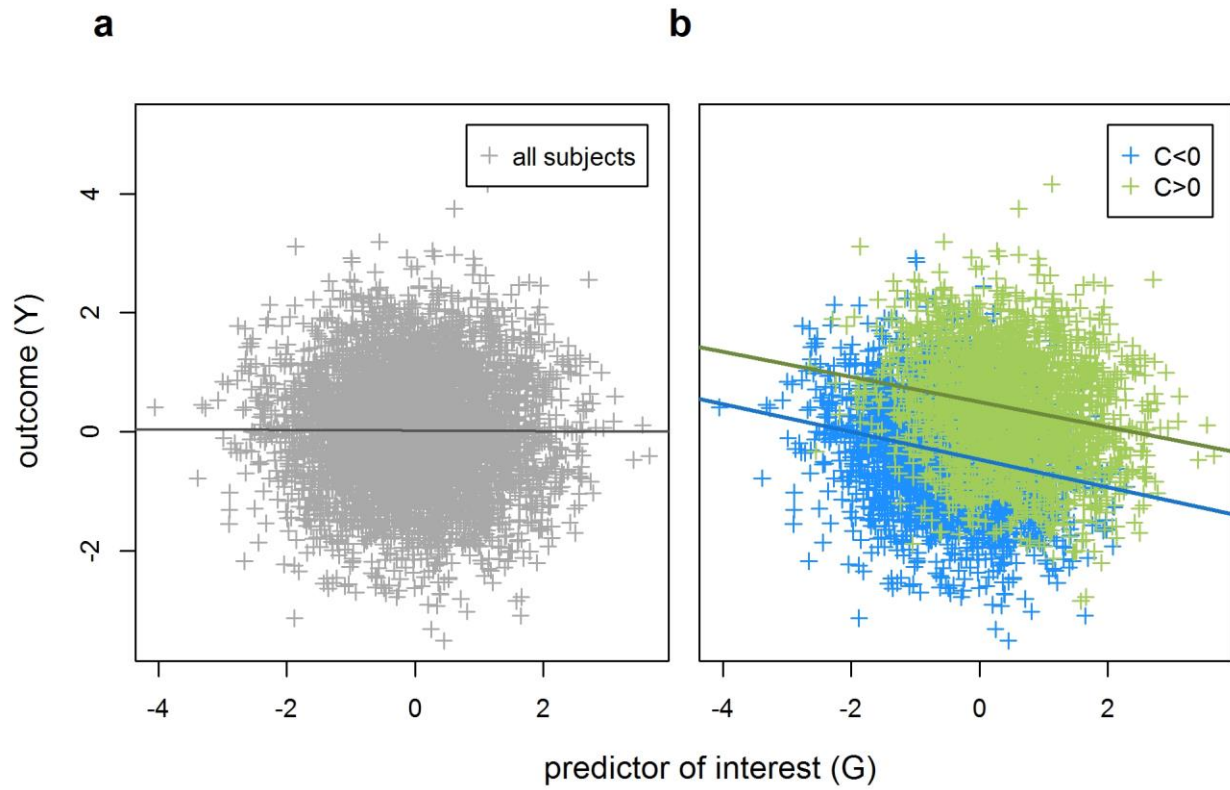



**Table S1. Genetic effect estimates and p-value for association with T2D before and after adjustment for BMI**

| SNP <sup>a</sup>  | Risk Allele | BMI ( <i>pval</i> )                            | T2D ( <i>pval</i> )             | T2D <sub>adjBMI</sub> ( <i>pval</i> ) |
|-------------------|-------------|------------------------------------------------|---------------------------------|---------------------------------------|
| rs2568958         | A           | 3.77 ( $1.2 \times 10^{-11}$ )                 | 0.0253 (0.038)                  | 0.0170 (0.15)                         |
| <b>rs10913469</b> | <b>C</b>    | <b>3.36 (<math>6.2 \times 10^{-8}</math>)</b>  | <b>-0.0044 (0.87)</b>           | <b>-0.0177 (0.27)</b>                 |
| rs7561317         | G           | 6.12 ( $4.2 \times 10^{-17}$ )                 | 0.0212 (0.22)                   | 0.0000 (0.9)                          |
| rs7647305         | C           | 4.42 ( $7.2 \times 10^{-11}$ )                 | 0.0334 (0.036)                  | 0.0128 (0.35)                         |
| <b>rs2844479</b>  | <b>T</b>    | <b>1.38 (0.003)</b>                            | <b>-0.0223 (0.11)</b>           | <b>-0.0315 (0.028)</b>                |
| <b>rs6265</b>     | <b>G</b>    | <b>4.58 (<math>5.1 \times 10^{-10}</math>)</b> | <b>-0.0088 (0.64)</b>           | <b>-0.0269 (0.12)</b>                 |
| rs925946          | T           | 3.85 ( $8.5 \times 10^{-10}$ )                 | 0.0170 (0.15)                   | 0.0043 (0.73)                         |
| rs7138803         | A           | 3.28 ( $1.2 \times 10^{-7}$ )                  | 0.0453 (0.00023)                | 0.0334 (0.009)                        |
| rs7498665         | G           | 3.63 ( $3.2 \times 10^{-10}$ )                 | 0.0212 (0.069)                  | 0.0128 (0.25)                         |
| rs6499640         | A           | 5.26 ( $4.0 \times 10^{-13}$ )                 | 0.0294 (0.027)                  | 0.0086 (0.48)                         |
| rs8050136         | A           | 8.04 ( $1.1 \times 10^{-47}$ )                 | 0.0531 ( $1.6 \times 10^{-5}$ ) | 0.0212 (0.086)                        |
| rs12970134        | A           | 4.38 ( $1.2 \times 10^{-12}$ )                 | 0.0170 (0.18)                   | 0.0000 (0.91)                         |
| rs29941           | C           | 4.18 ( $7.3 \times 10^{-12}$ )                 | 0.0043 (0.7)                    | 0.0000 (0.96)                         |

<sup>a</sup>We extracted SNPs found associated with BMI and/or weight and their estimated effect on BMI and T2D before and after adjustment for BMI from Thorleifsson et al<sup>2</sup>.

SNPs with decreased *p*-value for association with T2D after the adjustment for BMI are indicated in bold.

**Table S2. Additional examples of genetically-associated covariate GWAS**

| Outcome                                                                                                                                      | SNP             | Effect on the outcome <sup>a</sup>  |                                |                          | Effect on covariate <sup>b</sup>    |                         | opposite effect |   |
|----------------------------------------------------------------------------------------------------------------------------------------------|-----------------|-------------------------------------|--------------------------------|--------------------------|-------------------------------------|-------------------------|-----------------|---|
|                                                                                                                                              |                 | trait-increasing allele /alt allele | Unadjusted Pvalue <sup>c</sup> | Adjusted Pvalue          | trait-increasing allele /alt allele | pValue                  |                 |   |
| <i>Glycemic traits adjusted for BMI (positive correlation with the outcome)<sup>3</sup></i>                                                  |                 |                                     |                                |                          |                                     |                         |                 |   |
| Fasting Insulin                                                                                                                              | rs2943645       | T / C                               | 1.4 x 10 <sup>-7</sup>         | 2.3 x 10 <sup>-19</sup>  | C / T                               | 0.0069                  | x               |   |
|                                                                                                                                              | rs10195252      | T / C                               | 4.9 x 10 <sup>-10</sup>        | 1.3 x 10 <sup>-16</sup>  | C / T                               | 0.0093                  | x               |   |
|                                                                                                                                              | rs2126259       | T / C                               | 1.5 x 10 <sup>-10</sup>        | 3.3 x 10 <sup>-13</sup>  | T / C                               | 0.60                    |                 |   |
|                                                                                                                                              | rs4865796       | A / G                               | 2.1 x 10 <sup>-8</sup>         | 2.2 x 10 <sup>-12</sup>  | G / A                               | 5.1 x 10 <sup>-5</sup>  | x               |   |
|                                                                                                                                              | rs17036328      | T / C                               | 1.9 x 10 <sup>-5</sup>         | 3.6 x 10 <sup>-12</sup>  | C / T                               | 0.019                   | x               |   |
|                                                                                                                                              | rs731839        | G / A                               | 1.7 x 10 <sup>-8</sup>         | 5.1 x 10 <sup>-12</sup>  | A / G                               | 0.0052                  | x               |   |
|                                                                                                                                              | rs974801        | G / A                               | 2.1 x 10 <sup>-10</sup>        | 3.3 x 10 <sup>-11</sup>  | G / A                               | 0.89                    |                 |   |
|                                                                                                                                              | rs459193        | G / A                               | 6.6 x 10 <sup>-8</sup>         | 1.2 x 10 <sup>-10</sup>  | A / G                               | 0.22                    | x               |   |
|                                                                                                                                              | rs6822892       | A / G                               | 3.2 x 10 <sup>-5</sup>         | 2.6 x 10 <sup>-10</sup>  | G / A                               | 0.37                    | x               |   |
|                                                                                                                                              | rs4846565       | G / A                               | 2.0 x 10 <sup>-8</sup>         | 1.8 x 10 <sup>-9</sup>   | A / G                               | 0.29                    | x               |   |
|                                                                                                                                              | rs3822072       | A / G                               | 1.2 x 10 <sup>-4</sup>         | 1.8 x 10 <sup>-8</sup>   | G / A                               | 0.12                    | x               |   |
|                                                                                                                                              | rs6912327       | T / C                               | 2.8 x 10 <sup>-6</sup>         | 2.3 x 10 <sup>-8</sup>   | C / T                               | 0.066                   | x               |   |
|                                                                                                                                              | 2hGlu           | rs7651090                           | G / A                          | 1.1 x 10 <sup>+</sup>    | 4.5 x 10 <sup>-8</sup>              | A / G                   | 0.026           | x |
|                                                                                                                                              | Fasting Glucose | rs17762454                          | T / C                          | 1.9 x 10 <sup>-7</sup>   | 9.6 x 10 <sup>-9</sup>              | T / C                   | 0.46            |   |
| rs7708285                                                                                                                                    |                 | G / A                               | 4.9 x 10 <sup>-6</sup>         | 1.2 x 10 <sup>-8</sup>   | A / G                               | 0.034                   | x               |   |
|                                                                                                                                              | rs2657879       | G / A                               | 5.7 x 10 <sup>-6</sup>         | 3.9 x 10 <sup>-8</sup>   | A / G                               | 0.24                    | x               |   |
| <i>Body mass index adjusted for height (positive correlation with the outcome)<sup>4</sup></i>                                               |                 |                                     |                                |                          |                                     |                         |                 |   |
| BMI                                                                                                                                          | rs11676272      | G/A                                 | 6.0 x 10 <sup>-7</sup>         | 6.0 x 10 <sup>-9</sup>   | A/G                                 | 1.09 x 10 <sup>-6</sup> | x               |   |
| <i>Forced vital capacity (FVC) adjusted for height (positive correlation with the outcome)<sup>5</sup></i>                                   |                 |                                     |                                |                          |                                     |                         |                 |   |
|                                                                                                                                              | rs6923462       | T/C                                 | na                             | 5.89 x 10 <sup>-13</sup> | C/T                                 | 4.86 x 10 <sup>-6</sup> | x               |   |
|                                                                                                                                              | rs1430193       | A/T                                 | na                             | 1.86 x 10 <sup>-12</sup> | A/T                                 | 6.70 x 10 <sup>-7</sup> |                 |   |
|                                                                                                                                              | rs2863171       | C/A                                 | na                             | 8.97 x 10 <sup>-10</sup> | C/A                                 | 0.28                    |                 |   |
|                                                                                                                                              | rs6501431       | T/C                                 | na                             | 2.94 x 10 <sup>-9</sup>  | T/C                                 | 0.23                    |                 |   |
|                                                                                                                                              | rs1079572       | G/A                                 | na                             | 9.95 x 10 <sup>-9</sup>  | A/G                                 | 0.0098                  | x               |   |
|                                                                                                                                              | rs4237643       | G/T                                 | na                             | 3.53 x 10 <sup>-8</sup>  | G/T                                 | 0.91                    | x               |   |
| <i>Ratio of FVC over forced expiratory Volume in 1 second (FEV1) adjusted for height (negative correlation with the outcome)<sup>6</sup></i> |                 |                                     |                                |                          |                                     |                         |                 |   |
| A                                                                                                                                            | rs1980057       | T/C                                 | na                             | 3.21 x 10 <sup>-20</sup> | T/C                                 | 0.00073                 | x               |   |
| T                                                                                                                                            | rs1032295       | G/T                                 | na                             | 4.37 x 10 <sup>-15</sup> | G/T                                 | 0.00013                 | x               |   |
| G                                                                                                                                            | rs2070600       | T/C                                 | na                             | 3.15 x 10 <sup>-14</sup> | T/C                                 | 0.41                    | x               |   |
| T                                                                                                                                            | rs10947233      | T/G                                 | na                             | 6.66 x 10 <sup>-12</sup> | T/G                                 | 0.52                    | x               |   |
| T                                                                                                                                            | rs11168048      | C/T                                 | na                             | 1.08 x 10 <sup>-11</sup> | C/T                                 | 0.0065                  | x               |   |
| T                                                                                                                                            | rs7735184       | T/G                                 | na                             | 6.23 x 10 <sup>-11</sup> | T/G                                 | 0.0073                  | x               |   |
| T                                                                                                                                            | rs2277027       | A/C                                 | na                             | 9.93 x 10 <sup>-11</sup> | A/C                                 | 0.053                   | x               |   |
| G                                                                                                                                            | rs1422795       | T/C                                 | na                             | 2.62 x 10 <sup>-10</sup> | T/C                                 | 0.046                   | x               |   |
| G                                                                                                                                            | rs3817928       | G/A                                 | na                             | 1.17 x 10 <sup>-9</sup>  | A/G                                 | 2.0 x 10 <sup>-11</sup> |                 |   |
| C                                                                                                                                            | rs7776375       | G/A                                 | na                             | 6.71 x 10 <sup>-9</sup>  | A/G                                 | 9.4 x 10 <sup>-18</sup> |                 |   |
| G                                                                                                                                            | rs6937121       | G/T                                 | na                             | 1.25 x 10 <sup>-8</sup>  | T/G                                 | 1.2 x 10 <sup>-18</sup> |                 |   |

<sup>a</sup> We extracted SNPs found associated with human phenotypes at genome-wide significance level in population of European ancestry after adjusting for either body mass index or height, for which effect estimates can be extracted from the GIANT consortium database<sup>7</sup>.

<sup>b</sup> For each SNP selected we extracted from the GIANT consortium database<sup>7</sup> their p-value for association with BMI or height when relevant, and the trait-increasing allele.

<sup>c</sup> GWAS the unadjusted p-value and estimates were not available (noted "na").

**Table S3. Mean chi-square for adjusted and unadjusted analysis across 15 null models**

| Case-scenario                                         | Generative DAG <sup>a</sup> | Mean chi-square for the test of association between G and Y <sup>b</sup> |                |
|-------------------------------------------------------|-----------------------------|--------------------------------------------------------------------------|----------------|
|                                                       |                             | unadjusted                                                               | Adjusted for C |
| <i>G and Y share a common cause</i>                   | Figure S1a                  | 989.9                                                                    | 1.0            |
|                                                       | Figure S1b                  | 989.9                                                                    | 563.1          |
|                                                       | Figure S1c                  | 278.8                                                                    | 1.0            |
|                                                       | Figure S1d                  | 278.4                                                                    | 1.0            |
| <i>Effect of G on Y is mediated through C</i>         | Figure S1e                  | 989.7                                                                    | 1.0            |
|                                                       | Figure S1f                  | 279.0                                                                    | 1.0            |
|                                                       | Figure S1g                  | 278.8                                                                    | 1.0            |
|                                                       | Figure S1h                  | 989.6                                                                    | 563.3          |
| <i>An unmeasured variable influences both C and Y</i> | Figure S1i                  | 727.5                                                                    | 676.2          |
|                                                       | Figure S1j                  | 1.0                                                                      | 818.0          |
| <i>C and Y both influence an unmeasured variable</i>  | Figure S1k                  | 1.0                                                                      | 1.0            |
| <i>C is a descendant of Y</i>                         | Figure S1l                  | 1.0                                                                      | 2251.7         |
|                                                       | Figure S1m                  | 1.0                                                                      | 270.8          |
|                                                       | Figure S1n                  | 1.0                                                                      | 2143.4         |
|                                                       | Figure S1o                  | 1.0                                                                      | 444.0          |

<sup>a</sup>DAG: direct acyclic graph. For each DAG from Figure S1 we generated 10,000 replicates of 10,000 individuals. For simplicity all true effects were defined so that independent variables explain 30% of the variance of the dependent variable. All effects were positives.

<sup>b</sup>G, Y and C are the genetic variant, the outcome and the covariate included in the adjusted model, respectively.

## References

1. Vansteelandt, S., Goetgeluk, S., Lutz, S., Waldman, I., Lyon, H., Schadt, E.E., Weiss, S.T., and Lange, C. (2009). On the adjustment for covariates in genetic association analysis: a novel, simple principle to infer direct causal effects. *Genetic epidemiology* 33, 394-405.
2. Thorleifsson, G., Walters, G.B., Gudbjartsson, D.F., Steinthorsdottir, V., Sulem, P., Helgadottir, A., Styrkarsdottir, U., Gretarsdottir, S., Thorlacius, S., Jonsdottir, I., et al. (2009). Genome-wide association yields new sequence variants at seven loci that associate with measures of obesity. *Nature genetics* 41, 18-24.
3. Scott, R.A., Lagou, V., Welch, R.P., Wheeler, E., Montasser, M.E., Luan, J., Magi, R., Strawbridge, R.J., Rehnberg, E., Gustafsson, S., et al. (2012). Large-scale association analyses identify new loci influencing glycemic traits and provide insight into the underlying biological pathways. *Nature genetics* 44, 991-1005.
4. Stergiakouli, E., Gaillard, R., Tavare, J.M., Balthasar, N., Loos, R.J., Taal, H.R., Evans, D.M., Rivadeneira, F., St Pourcain, B., Uitterlinden, A.G., et al. (2014). Genome-wide association study of height-adjusted BMI in childhood identifies functional variant in ADCY3. *Obesity*.
5. Loth, D.W., Artigas, M.S., Gharib, S.A., Wain, L.V., Franceschini, N., Koch, B., Pottinger, T.D., Smith, A.V., Duan, Q., Oldmeadow, C., et al. (2014). Genome-wide association analysis identifies six new loci associated with forced vital capacity. *Nature genetics* 46, 669-677.
6. Hancock, D.B., Eijgelsheim, M., Wilk, J.B., Gharib, S.A., Loehr, L.R., Marcante, K.D., Franceschini, N., van Durme, Y.M., Chen, T.H., Barr, R.G., et al. (2010). Meta-analyses of genome-wide association studies identify multiple loci associated with pulmonary function. *Nature genetics* 42, 45-52.
7. Speliotes, E.K., Willer, C.J., Berndt, S.I., Monda, K.L., Thorleifsson, G., Jackson, A.U., Lango Allen, H., Lindgren, C.M., Luan, J., Magi, R., et al. (2010). Association analyses of 249,796 individuals reveal 18 new loci associated with body mass index. *Nature genetics* 42, 937-948.
